# Supplementary material
Source: Springer Nature journal article supplement (https://www.springermedizin.de/resource/supplementary/12875_2007_289_MOESM1_ESM.pdf/9436678)

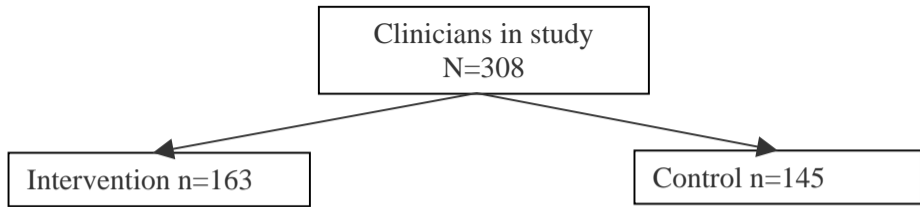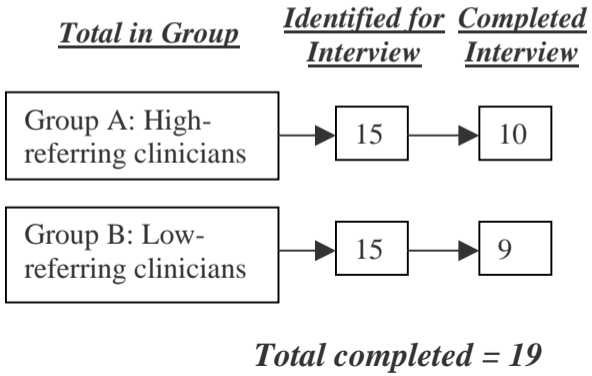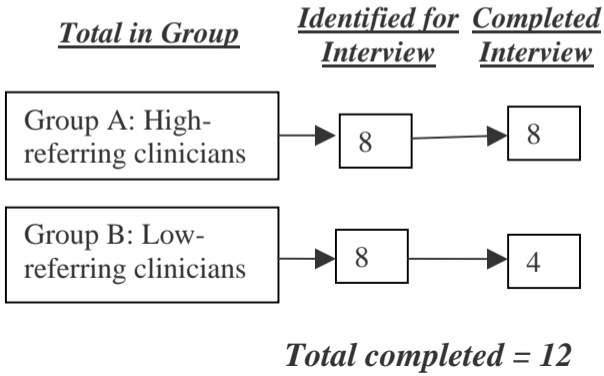

Supplement: MOESM1 [file 9436678]
